# Supplementary material for: Distinct 5-methylcytosine profiles in poly(A) RNA from mouse embryonic stem cells and brain
Source: PubMed Central journal article supplement (PMC5225599; doi:10.1186/s13059-016-1139-1), 2017-01-05
Supplement: 13059_2016_1139_MOESM2_ESM.pdf [file 13059_2016_1139_MOESM2_ESM.pdf]

# **Distinct 5-methylcytosine profiles in poly(A)RNA from mouse embryonic stem cells and the brain**

Thomas Amort<sup>1§</sup>, Dietmar Rieder<sup>2§</sup>, Alexandra Wille<sup>1</sup>, Daria Khokhlova-Cubberley<sup>3</sup>, Christian Riml<sup>4</sup>,  
Lukas Tria<sup>1</sup>, Xi-Yu Jia<sup>3</sup>, Ronald Micura<sup>4</sup>, Alexandra Lusser<sup>1\*</sup>

## **Additional file 2: Supplementary Figures**

## Supplementary Figures

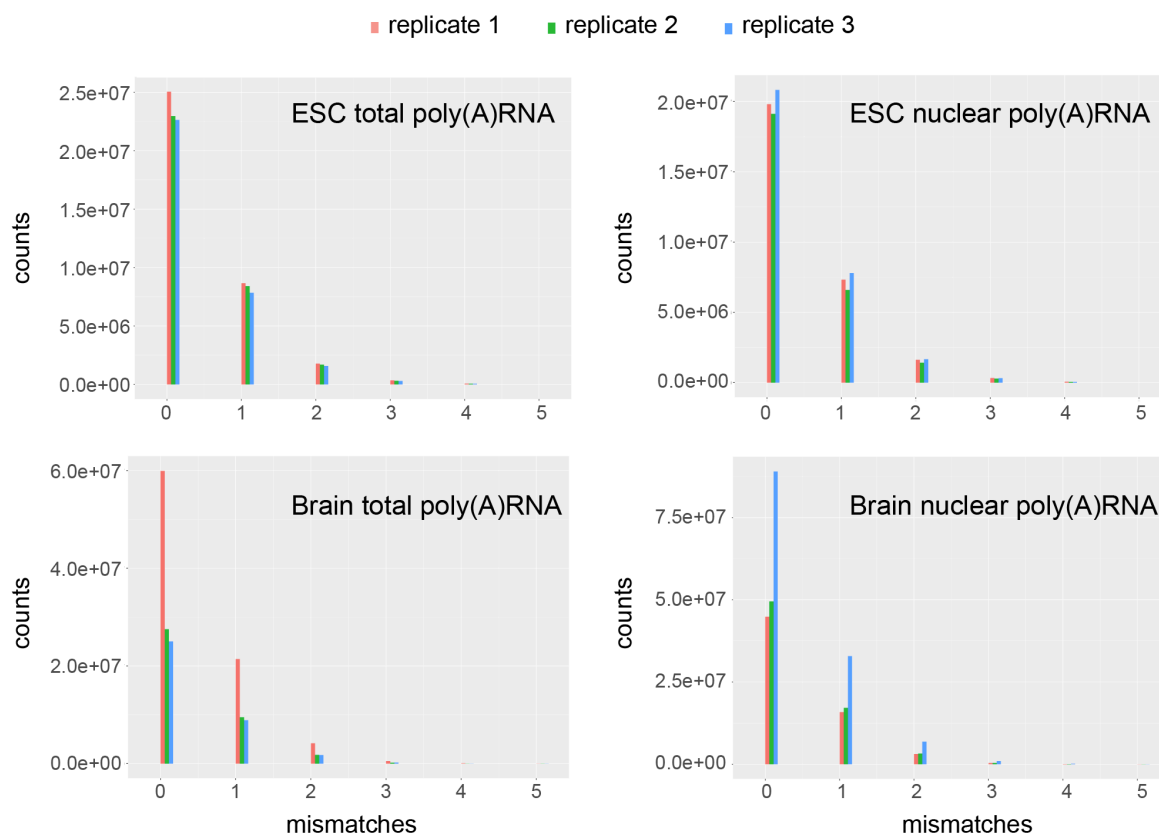

**Figure S1. Distribution of sequencing reads aligned with 0, 1, 2, 3, 4 or 5 mismatches to the reference genome.** Y-axis represents the number of reads aligned with the number of mismatches indicated on the X-axis.

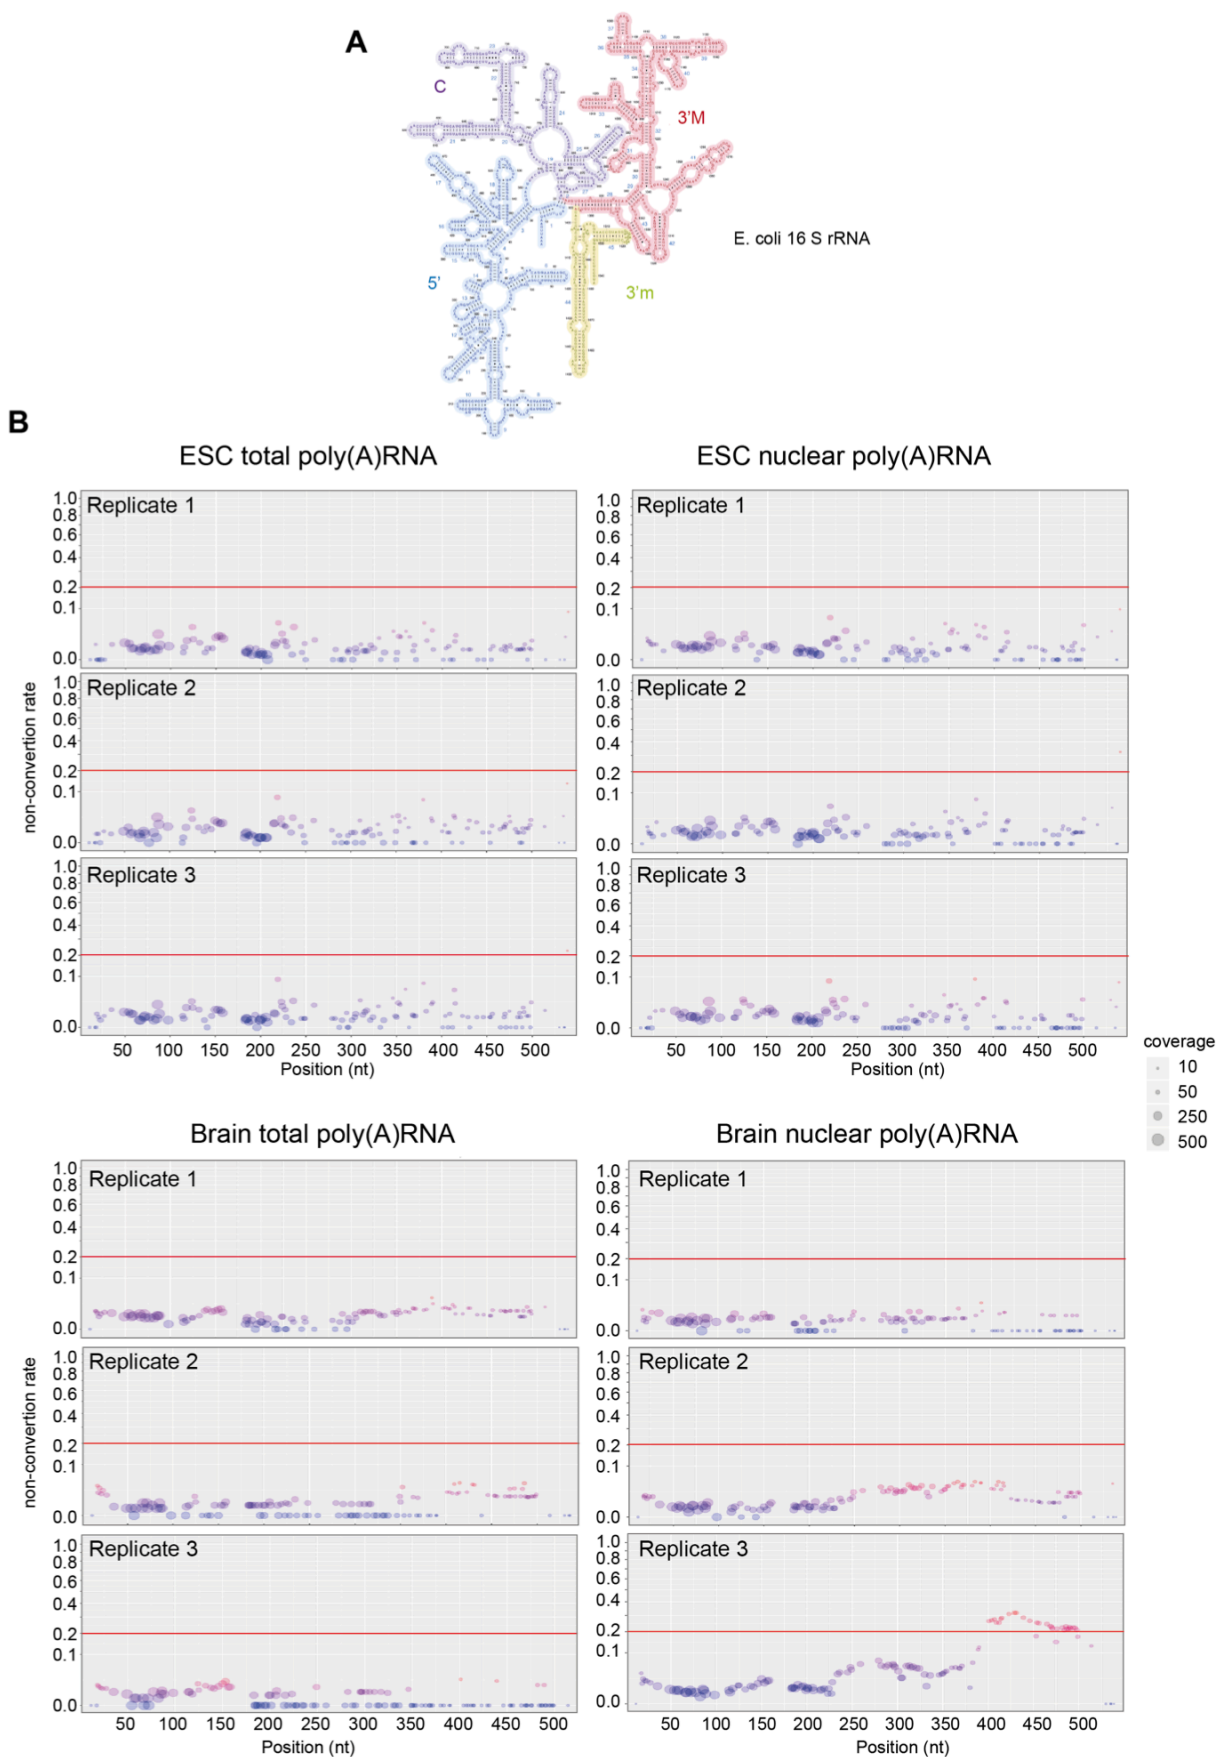

**Figure S2. Distribution of cytosine conversion along *E. coli* 16S rRNA negative control. a** Secondary structure depiction of *E. coli* 16S rRNA. The spike-in control sequence covers all of region 3'M and half of region 3'm. **b** Plots of non-conversion rates of each cytosine along the 16S rRNA control sequence. The red line marks the non-conversion threshold of 0.2. None of the cytosines shows

non-conversion above 0.2, except for a few in replicate 3 of brain nuclear poly(A)RNA. Importantly, these cytosines were eliminated by filtering for presence in all three replicates. Extent of sequencing coverage is symbolized by circle size and explained in the legend.

**A**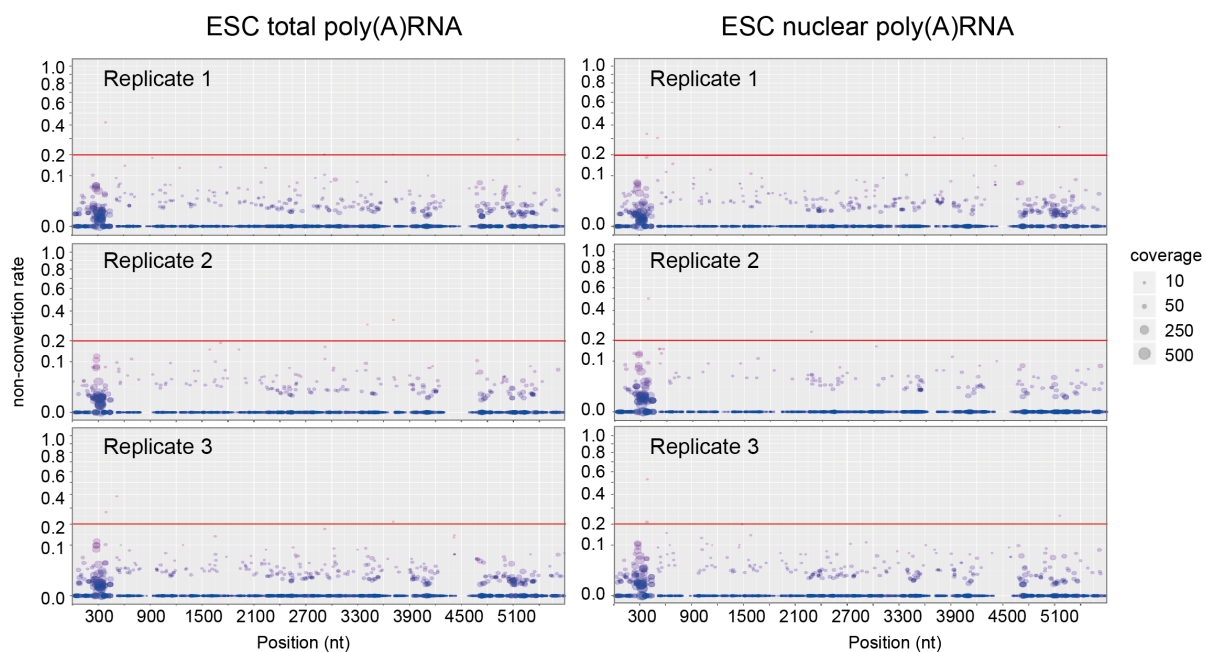**B**

| refPos                    | norm(avg/cov) | norm<br>(avg/C_count) | avg/methRate | sem/methRate | comb/p-value<br>mRate | rep |
|---------------------------|---------------|-----------------------|--------------|--------------|-----------------------|-----|
| <b>total poly(A)RNA</b>   |               |                       |              |              |                       |     |
| 3713*                     | 16            | 3                     | 0.249        | 0.034        | 7.89E-10              | 3   |
| <b>nuclear poly(A)RNA</b> |               |                       |              |              |                       |     |
| 387*                      | 20            | 9                     | 0.454        | 0.05         | 3.84E-07              | 3   |

**Figure S3. Distribution of cytosine conversion along pET15b negative control.** **a** Plot of non-conversion rates for each cytosine along the entire control sequence. The red line marks the non-conversion threshold of 0.2. Extend of sequencing coverage is symbolized by circle size and explained in the legend. **b** One cytosine each for total and nuclear poly(A)RNA was detected as m5C candidate upon basic data filtering. Additional filtering for secondary structure potential eliminated these positions (designated with an asterisk).

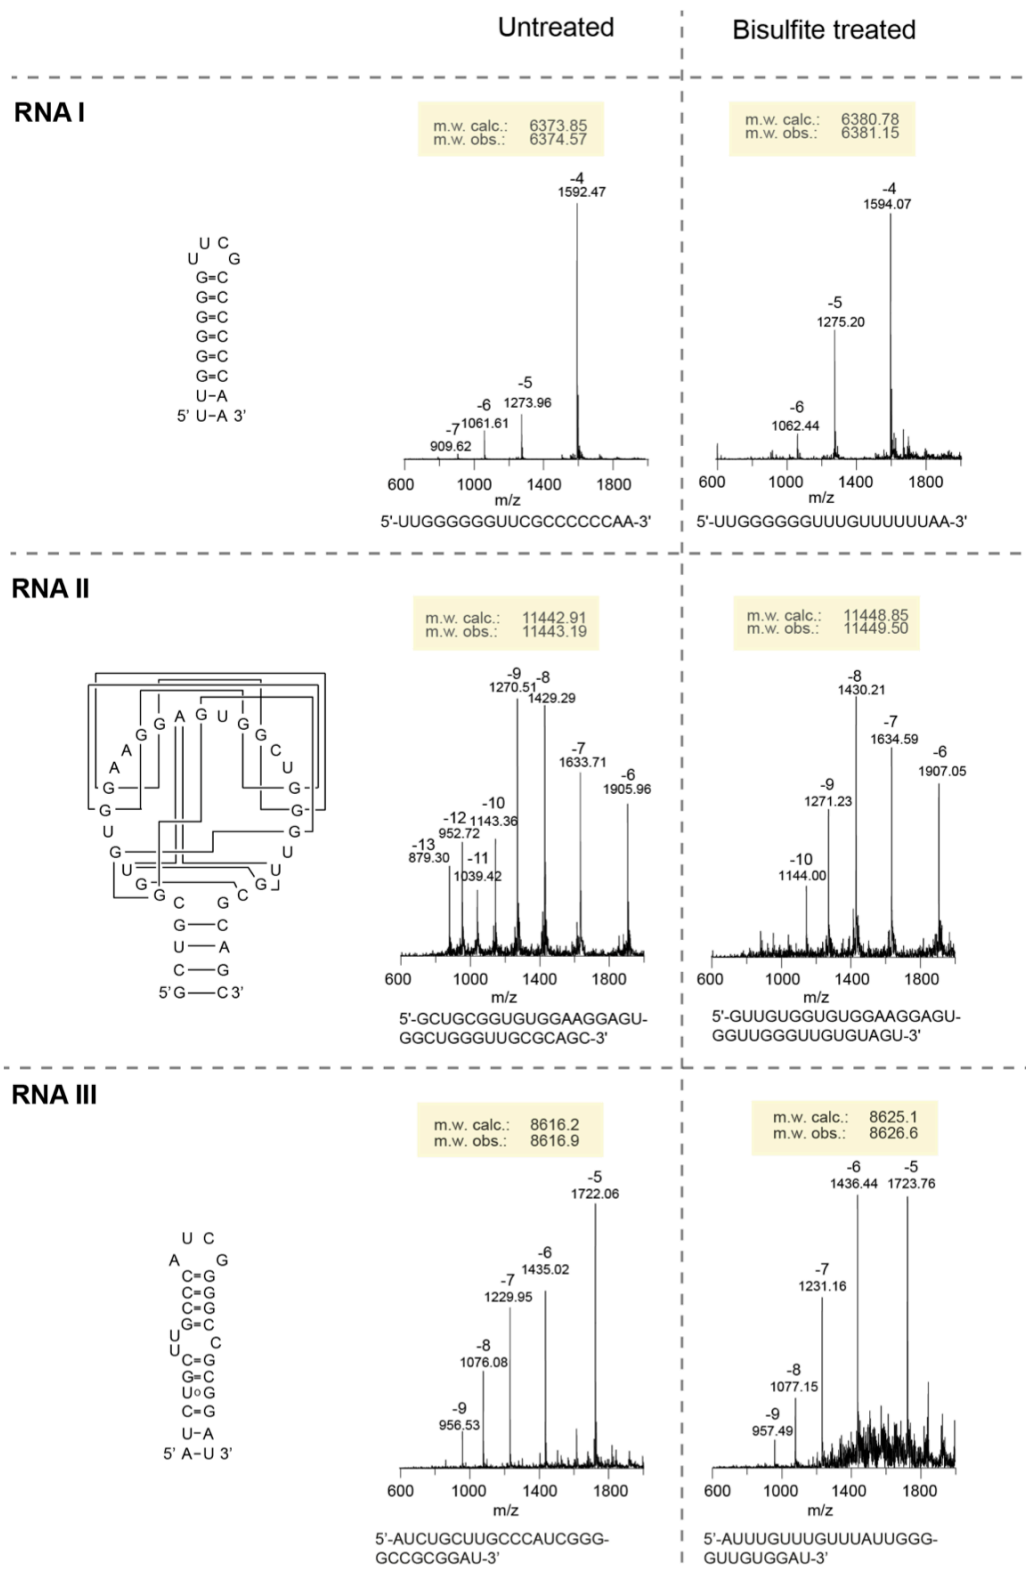

**Figure S4. Mass spectrometry analysis of three unmethylated RNA oligos before and after bisulfite treatment.** The secondary structures of the RNAs are shown at the left, the mass spectra are on the right. The structures for RNAs II and III were determined experimentally [1,2], while the RNA I structure is predicted. The text highlighted in yellow shows the calculated weights versus the observed molecular weights in atomic mass units [amu]. For calculation of the molecular weights after bisulfite treatment, complete conversion of all cytosines to uracil was assumed.

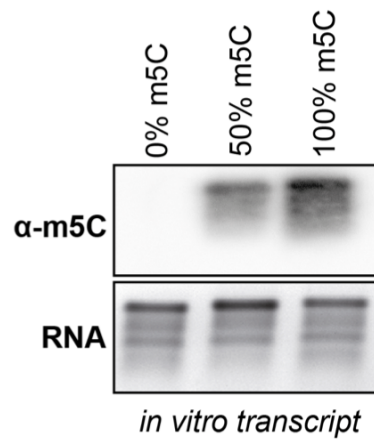

**Figure S5. Immuno-northern blot detection of m5C.** The m5C antibody specifically recognizes m5C in RNA. A 552 nt RNA fragment of *E. coli* 16S rRNA was generated by *in vitro* transcription in the presence of 0, 50 or 100% m5C ribonucleotides, separated on a 1.2% denaturing RNA gel and blotted to a nylon membrane. The membrane was incubated with anti-m5C antibody and detected using ECL (upper panel), the ethidium bromide-stained RNA is shown in the lower panel.

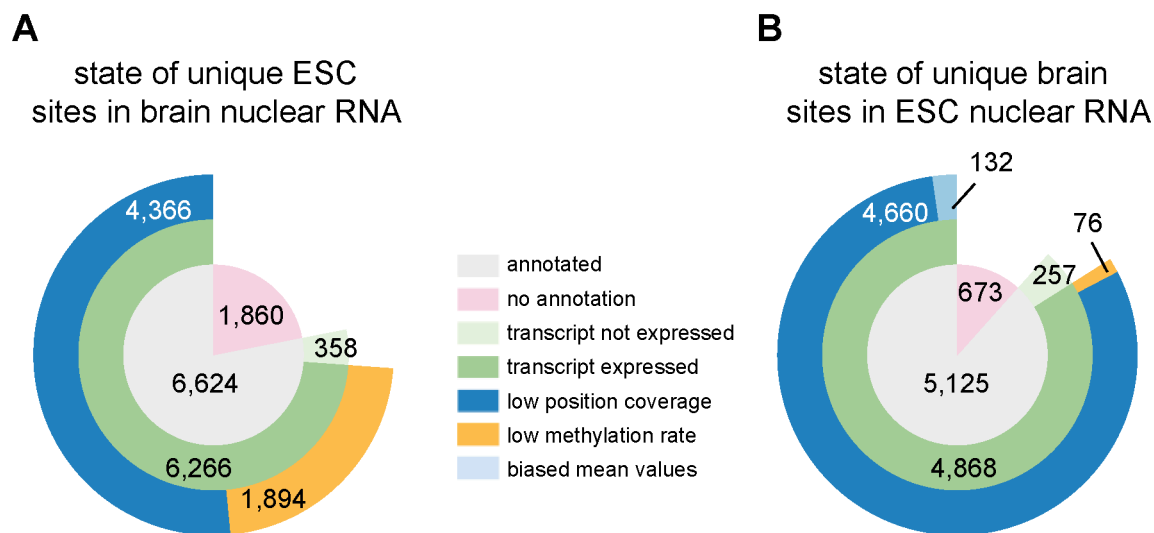

**Fig. S6 Analysis of cytosines uniquely methylated in nuclear poly(A)RNA of ESCs or brain. a** The expression levels and methylation rates of m5Cs identified as unique to ESCs were analyzed in the brain samples. **b** The expression levels and methylation rates of m5Cs identified as unique to brain were analyzed in the ESC samples. Multi-level pie charts display the numbers of sites on annotated and non-annotated transcripts in the innermost ring, the numbers of sites on transcripts with a mean normalized count of more (dark green) or fewer (light green) than 10 reads in the middle ring, and the numbers of sites with sequence coverage <10 reads (blue) or sequence coverage >10 reads but methylation rate lower than 0.2 (yellow) in the outer ring. Positions in which the mean values for coverage and non-conversion were skewed towards methylation by an individual replicate were classified as “biased mean”.



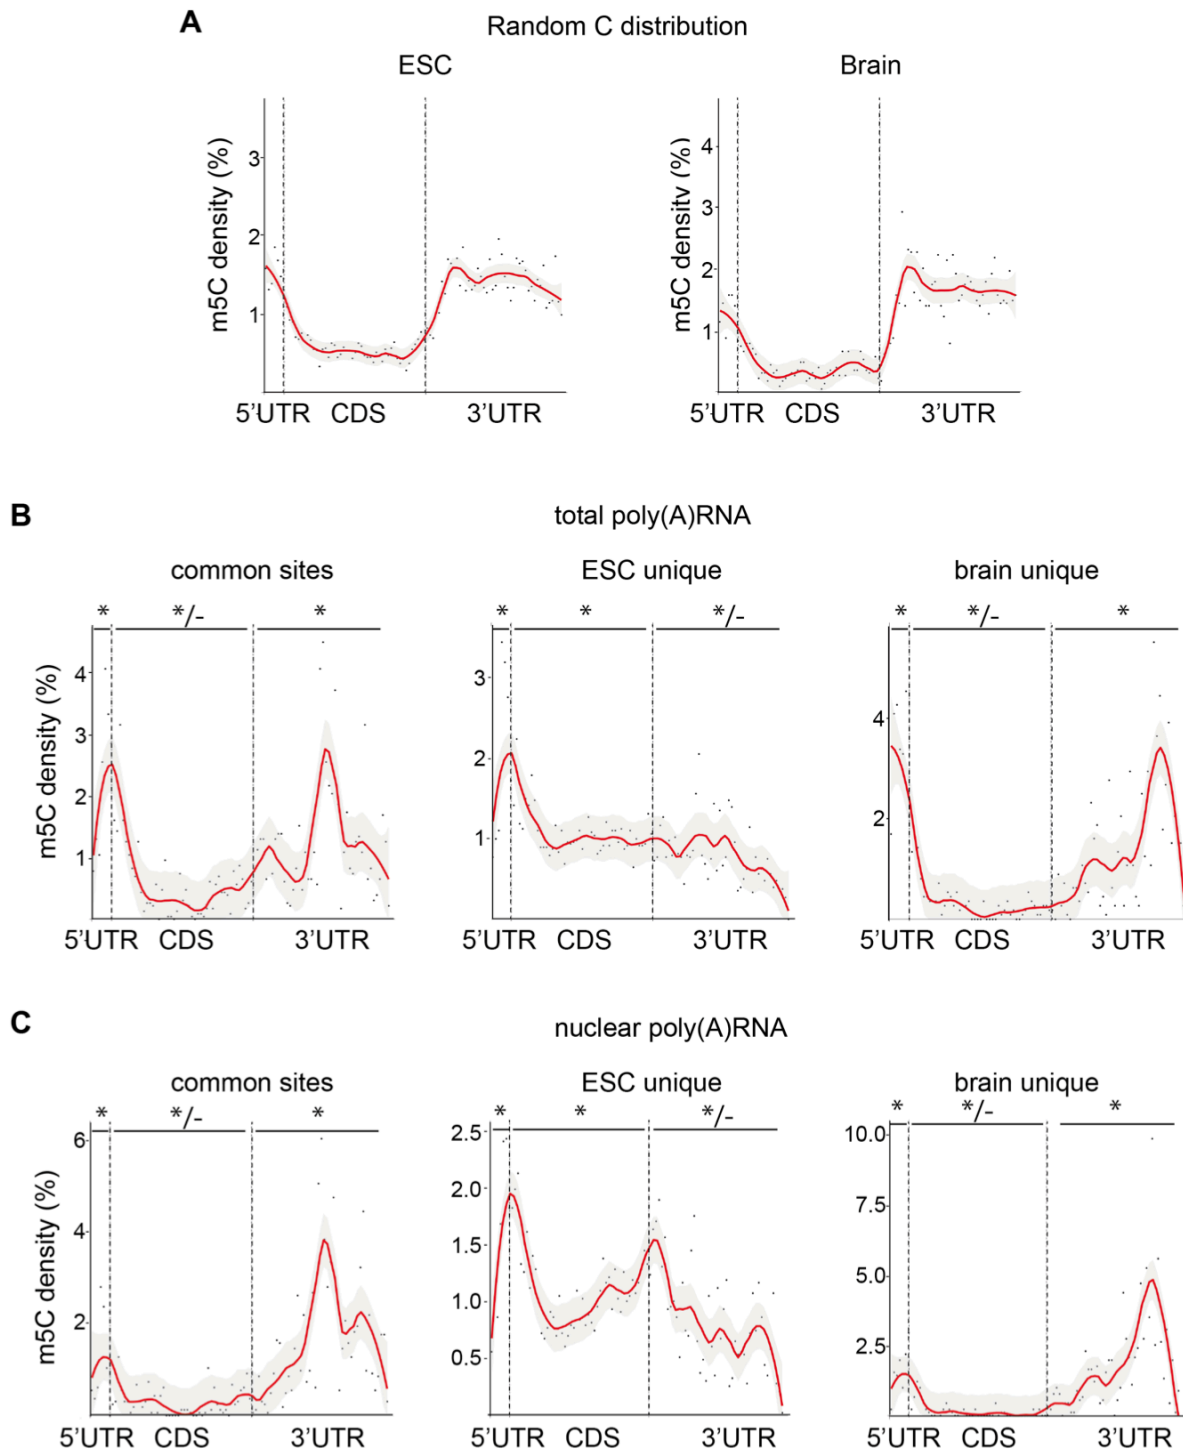

**Figure S7. Metagene profiles of m5C distribution in total and nuclear poly(A)RNA from ESCs and brain.** **a** Metagene profiles of Cs randomly sampled from the transcripts that showed methylation. The random C data set was of identical size as the m5C dataset from the different samples. Random C profiles for total poly(A)RNA from ESC and brain are shown, profiles for nuclear poly(A)RNA look very similar and are not shown. **b** Transcripts methylated in total poly(A)RNA of ESCs and brain (*common*) or specifically in ESCs and brain only (*unique*) are shown. **c** Transcripts methylated in

nuclear poly(A)RNA of ESCs and brain (*common*) or specifically in ESCs and brain only (*unique*) are shown. Metagene segments 5'UTR, CDS and 3'UTR are indicated. Enrichment or depletion of m5C in a particular segment was analyzed by Fisher exact and hypergeometric test with a significance threshold of  $p < 0.05$ . Significant enrichment is indicated by \*, significant depletion is indicated by \*/-.

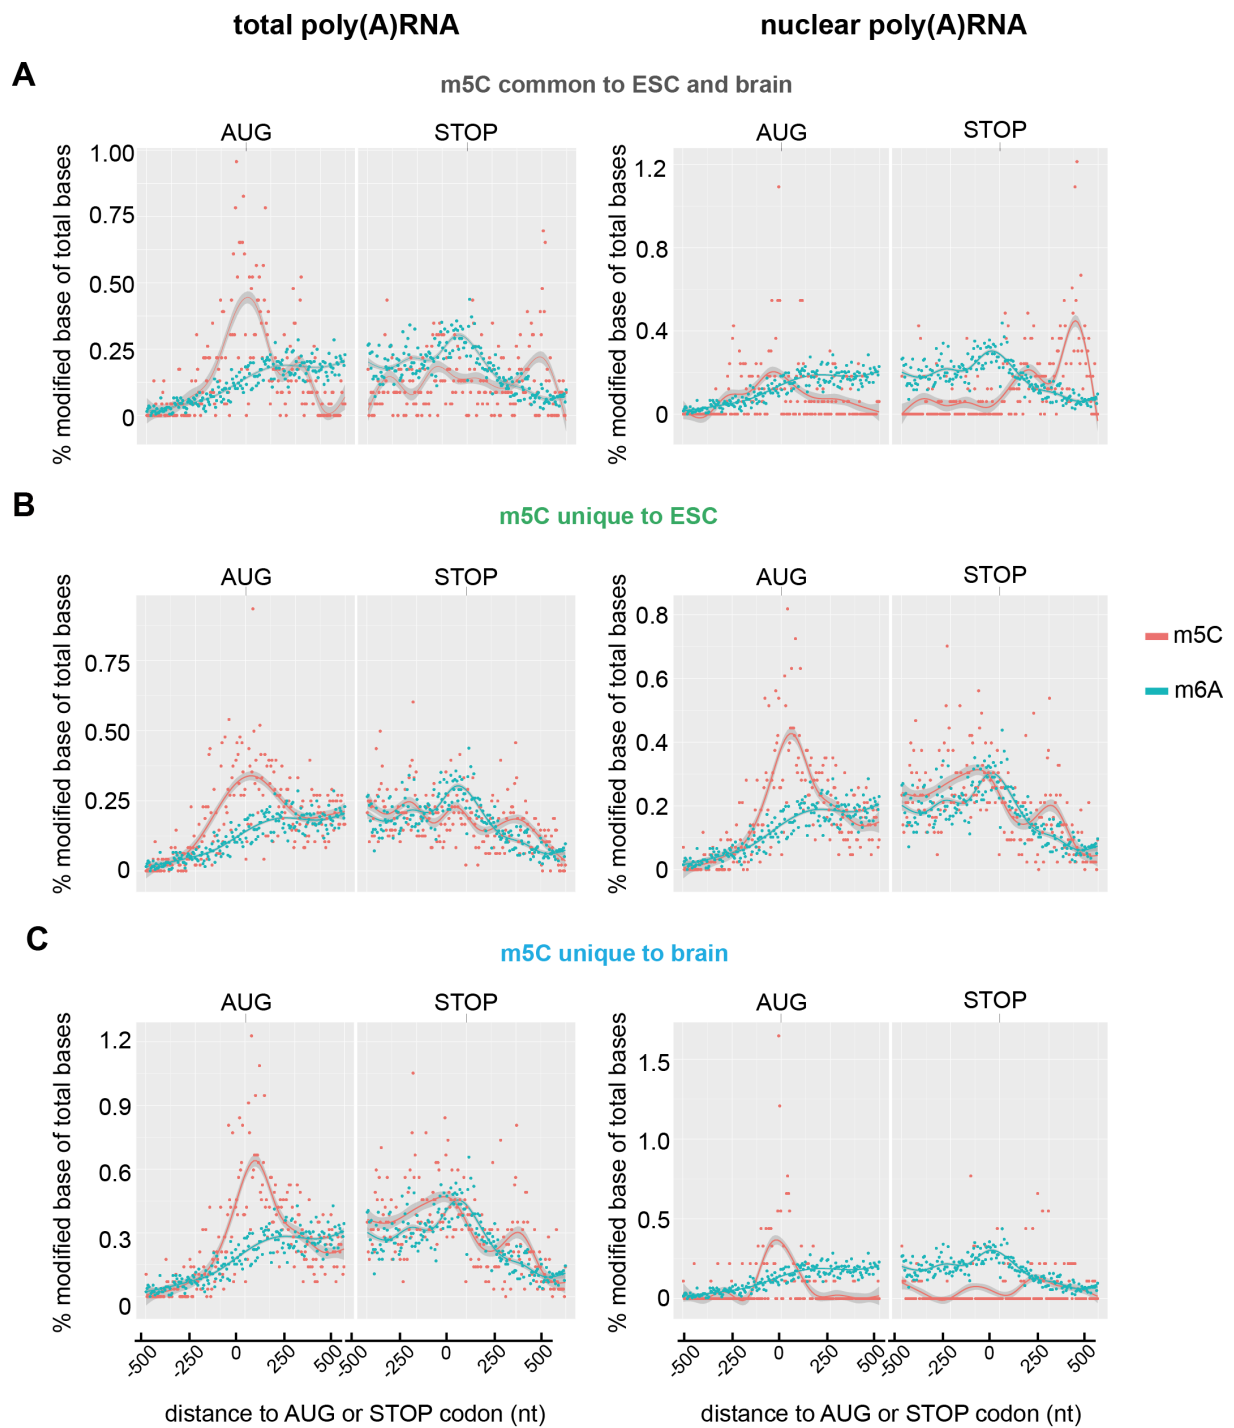

**Figure S8. Distribution of m5C and m6A around translational start and stop codons.** **a** The frequency of m5C in total poly(A)RNA (*left*) or nuclear poly(A)RNA (*right*) of ESCs and brain within +/- 500 nt around the translational start (*AUG*) and stop codons is shown. m6A data were retrieved from MeT-db and plotted along the m5C data for comparison. **b** Same as in **a** for m5C positions unique to ESCs. **c** Same as in **a** for m5C positions unique to brain.

**A**

ESC total poly(A)RNA

m-bias plots: forward reads

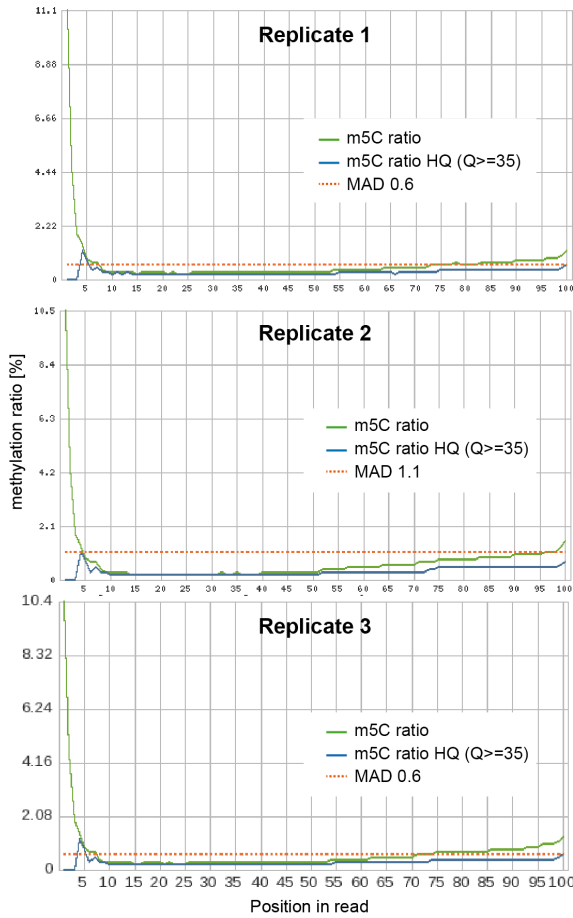**B**

ESC nuclear poly(A)RNA

m-bias plots: forward reads

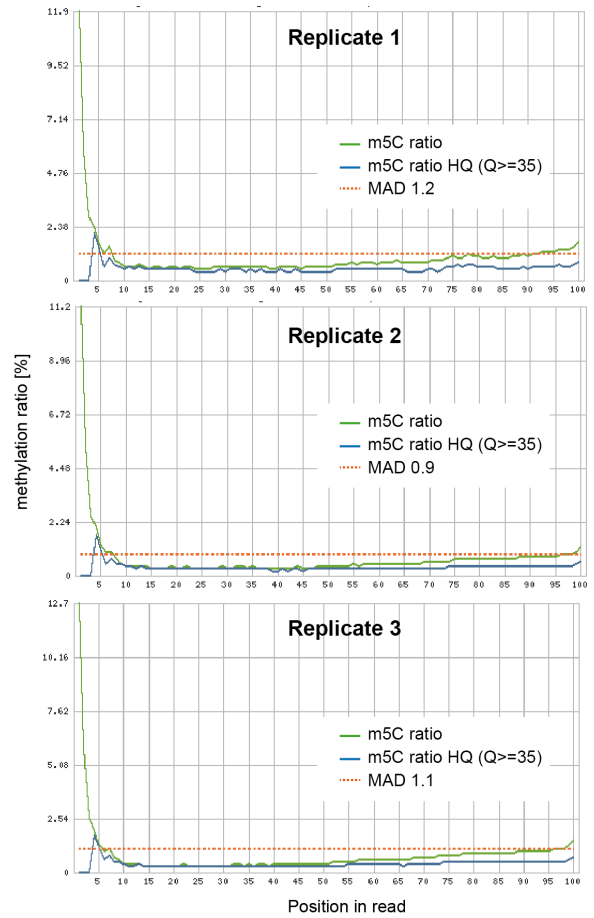**C**

Brain total poly(A)RNA

m-bias plots: forward reads

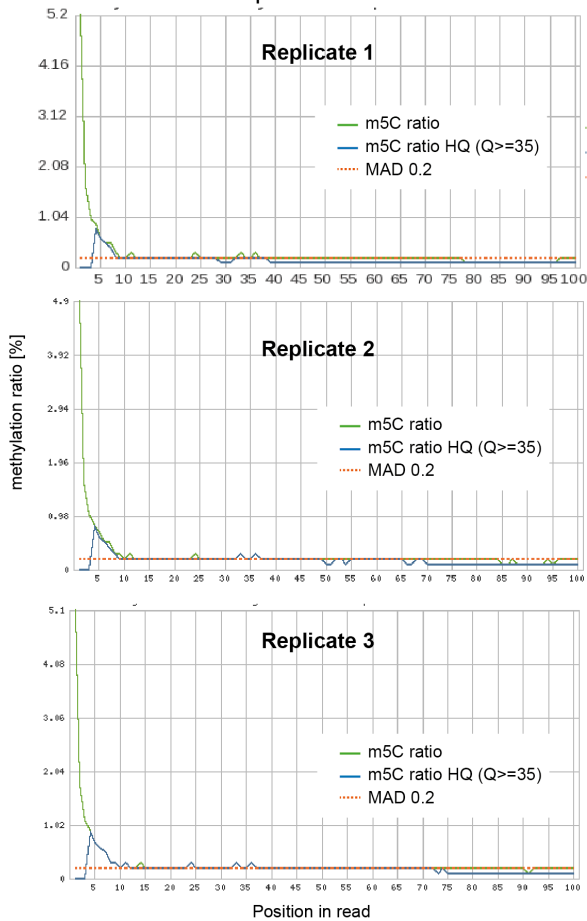

m-bias plots: reverse reads

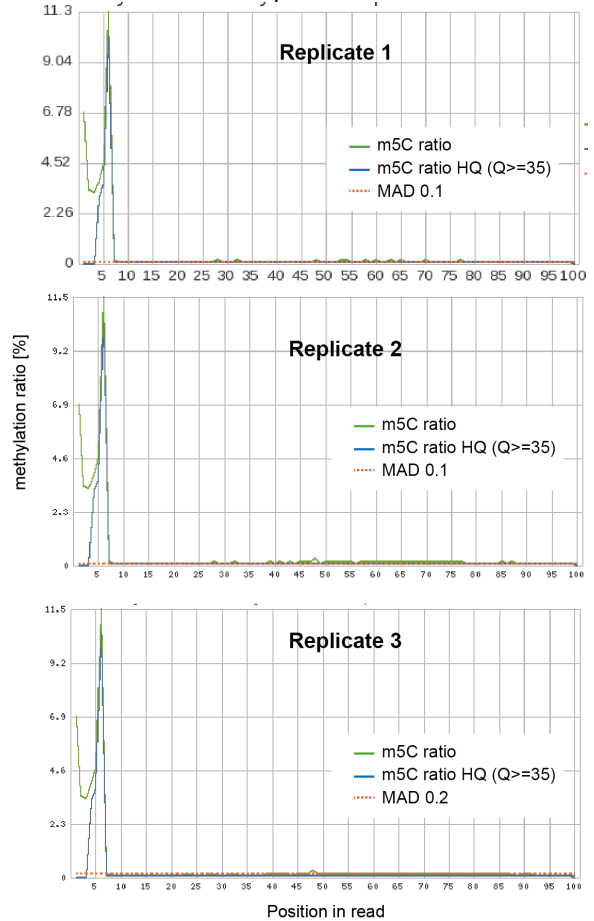

**D**

## Brain nuclear poly(A)RNA

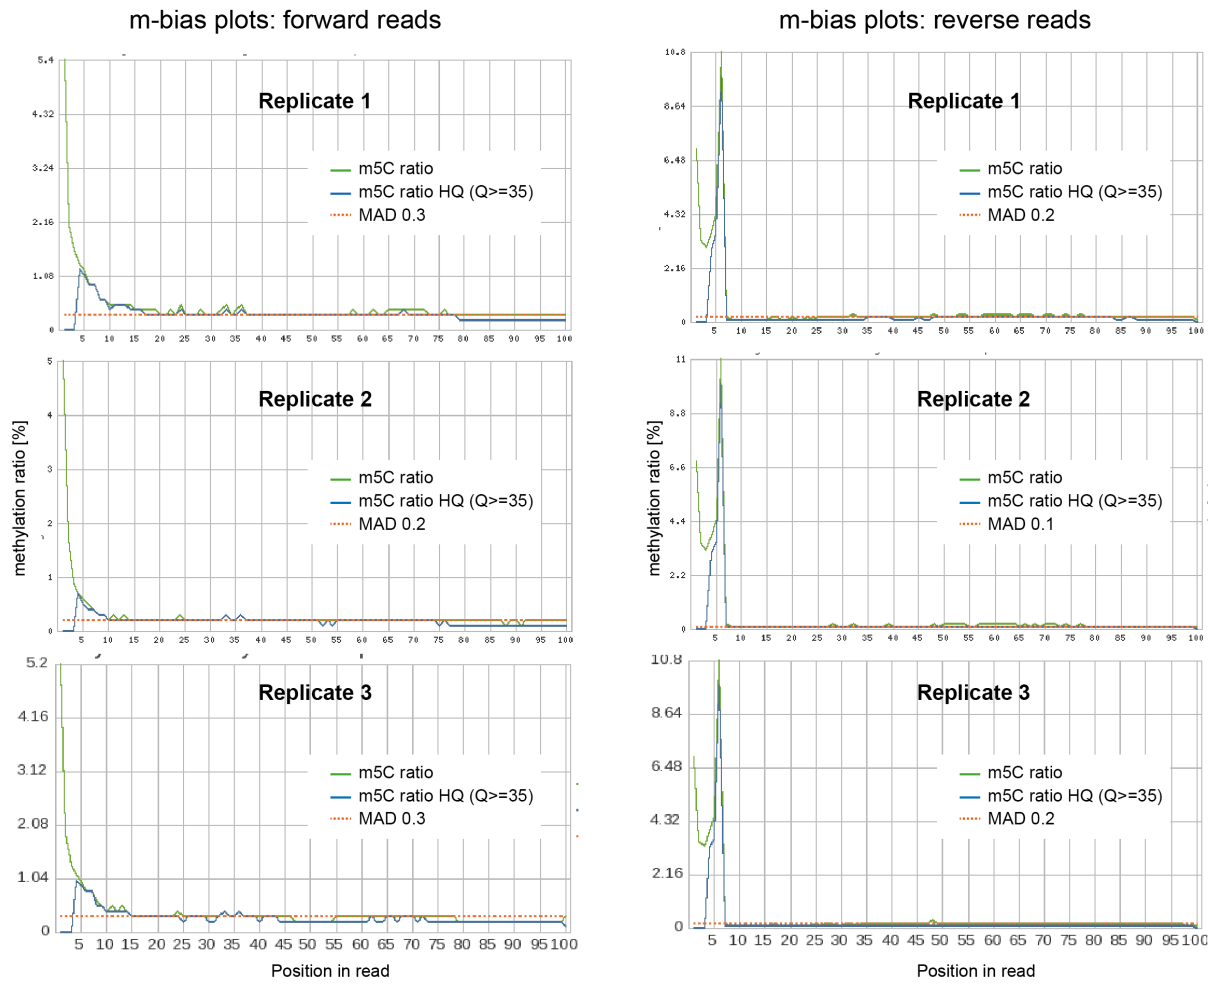

**Figure S9. Cytosine 5 methylation bias plots. a, b** m-bias of single-end reads of ESC total (a) and nuclear (b) poly(A)RNA samples. **c, d** m-bias of paired-end reads of brain total (c) and nuclear (d) poly(A)RNA samples. MAD, median plus 2x median absolute deviation.
